# Supplementary material for: Automatic delineation of geomorphological slope-units and their optimization for landslide susceptibility modelling
Source: Copernicus journal article supplement (doi:10.5194/gmd-2016-118), 2016-06-21
Supplement: Supplementary file [file gmd-2016-118-AC1-supplement.pdf]

## Answer to the Executive Editor's comment

Dear authors,

In my role as Executive editor of GMD, I would like to bring to your attention our Editorial version 1.1:

<http://www.geosci-model-dev.net/8/3487/2015/gmd-8-3487-2015.html>

This highlights some requirements of papers published in GMD, which is also available on the GMD website in the 'Manuscript Types' section:

[http://www.geoscientific-model-development.net/submission/manuscript\\_types.html](http://www.geoscientific-model-development.net/submission/manuscript_types.html)

In particular, please note that for your paper, the following requirements have not been met in the Discussions paper:

- "The main paper must give the model name and version number (or other unique identifier) in the title."

Please add the name and version number of your model / tool r.slopeunits to the title.

Additionally, I'd like to point out, that the Code Availability Section is not an Appendix but a Section of its own. Please correct both mentioned items in the revised submission of your article.

Yours,

Astrid Kerkweg

Dear Dr. Kerkweg,

thanks reviewing our manuscript and pointing out the corrections needed. We added our software name and version number (r.slopeunits v1.0) to the title, and changed the "Code Availability" Section from Appendix to a regular Section.

M. Alvioli, on behalf of all the Authors.
